# Supplementary material
Source: publisher figshare collection journal article supplement (https://acs.figshare.com/ndownloader/files/6136944)
Supplement: Supplementary file 1 [file 6136944]

## Supporting Information

### **Periphyton biofilms influence net methylmercury production in an industrially contaminated system**

Todd A. Olsen<sup>1</sup>, Craig C. Brandt<sup>2</sup>, and Scott C. Brooks<sup>\*,1</sup>

<sup>1</sup> Environmental Sciences Division, Oak Ridge National Laboratory, P.O. Box 2008 MS 6038, Oak Ridge, Tennessee 37831-6038

<sup>2</sup> Biosciences Division, Oak Ridge National Laboratory, P.O. Box 2008 MS 6038, Oak Ridge, Tennessee 37831-6038

\*Corresponding author:

Scott Brooks, Environmental Sciences Division, Oak Ridge National Laboratory, P.O. Box 2008 MS 6038, Oak Ridge, Tennessee 37831-6038; e-mail: brookssc@ornl.gov; telephone: 865-574-6398

**15 pages, 4 figures, 8 tables**

This manuscript has been authored by UT-Battelle, LLC under Contract No. DE-AC05-00OR22725 with the U.S. Department of Energy. The United States Government retains and the publisher, by accepting the article for publication, acknowledges that the United States Government retains a non-exclusive, paid-up, irrevocable, world-wide license to publish or reproduce the published form of this manuscript, or allow others to do so, for United States Government purposes. The Department of Energy will provide public access to these results of federally sponsored research in accordance with the DOE Public Access Plan (<http://energy.gov/downloads/doe-public-access-plan>).

## Table of Contents

|                                                                                                                     |     |
|---------------------------------------------------------------------------------------------------------------------|-----|
| <b>Quality assurance/quality control</b> .....                                                                      | S3  |
| <b>Sand used to disturb periphyton structure</b> .....                                                              | S3  |
| <b>Additional site description details</b> .....                                                                    | S3  |
| <b>Periphyton MMHg flux assumptions and calculations</b> .....                                                      | S3  |
| <b>Equation S1: Total MMHg flux by periphyton</b> .....                                                             | S4  |
| <b>Figure S1: Periphyton growth structure photographs</b> .....                                                     | S6  |
| <b>Figure S2: Percent MMHg in EFPC periphyton and sediment</b> .....                                                | S7  |
| <b>Figure S3: Seasonal patterns in MMHg concentrations in EFPC</b> .....                                            | S7  |
| <b>Figure S4: MMHg flux attributed to periphyton February 2015</b> .....                                            | S8  |
| <b>Table S1: Methylation and demethylation rate potential intercomparison</b> .....                                 | S9  |
| <b>Table S2: Upstream versus downstream water chemistry comparison</b> .....                                        | S10 |
| <b>Table S3: Matrix depicting treatment factors in experiments</b> .....                                            | S11 |
| <b>Table S4: Creek water temperatures for period preceding assays</b> .....                                         | S11 |
| <b>Table S5: Treatment overview and results for net methylation assays</b> .....                                    | S12 |
| <b>Table S6: Analysis of variance results from cell means model for <math>k_m</math> and <math>k_d</math></b> ..... | S13 |
| <b>Table S7: Probabilities of pairwise cell differences</b> .....                                                   | S14 |
| <b>Table S8: Results of the cell means analysis</b> .....                                                           | S15 |

### *Quality assurance/quality control*

Reference materials were analyzed to verify method performance. For ERM-CC580 methylmercury in estuarine sediment we measured 72.88 ng-MMHg/g versus the certified value of  $75 \pm 4$  ng-MMHg/g and for IAEA-407 Fish Homogenate (methylmercury) we measured 0.192  $\mu$ g-MMHg/g versus the certified 95% confidence interval of 0.188 – 0.212 ng-MMHg/g. Continuing calibration verification samples were ran at least every 30 samples ( $n = 11$ ) with mean recovery  $98 \pm 2\%$ .

### *Sand used to disturb periphyton structure*

Iota Standard quartz sand (Unimin Corp., New Canaan, CT), with a grain size range of 150-250  $\mu$ m, was used; the sand had essentially no contamination from other primary or secondary minerals. The sand was soaked for at least 24 hours in 1 N HNO<sub>3</sub>, then rinsed with reagent grade water until the rinse water had the same conductivity as reagent grade water. It was then baked at 550 °C in a muffle furnace for 16 hr.

### *Additional Site Description Details*

Over the 12-month period beginning April 2014 the average stream discharge increased from 0.149 m<sup>3</sup> s<sup>-1</sup> at the upstream sampling location to 1.35 m<sup>3</sup> s<sup>-1</sup> at the downstream sampling location. Streamflow is higher in the winter and early spring and decreases in late-spring through mid-autumn due to increased evapotranspiration. Approximately 8 km upstream of our downstream sampling location the city of Oak Ridge wastewater treatment plant discharges treated effluent adding dissolved carbon, nitrate and phosphorous to EFPC. Nevertheless, the creek is meso- to eutrophic with respect to nitrogen and phosphorous along its entire length. The upper reach of EFPC is located in an urban environment. The downstream reach flows through residential, open-land, and forested areas. A comparison of the water chemistries between the two sites can be found in Table S2.

### *Periphyton MMHg flux assumptions and calculations*

The methylation ( $k_m$ ) and demethylation ( $k_d$ ) rate potentials ( $d^{-1}$ ) determined in the stable isotope assays were used, along with the bioavailable ambient Hg concentrations, to calculate the net methylation rate of periphyton ( $ng\ g-dw^{-1}\ d^{-1}$ ; Figure 1C of the paper). This rate can be scaled up to estimate the flux of MMHg ( $mg\ d^{-1}$ ) in EFPC due to periphyton activity.

$$Total\ MMHg\ Flux = (k_m[Hg_{bioav}^{II}] - k_d[MMHg_{bioav}]) (Total\ periphyton\ mass) \quad (S1)$$

$Hg_{bioav}^{II}$  is the ambient  $Hg^{II}$  concentration available for methylation and  $MMHg_{bioav}$  is the ambient MMHg concentration available for demethylation. The total periphyton mass was estimated using the area density (calculated by taking the dry mass of the periphyton sample and dividing by the area of the disc to be  $1\ kg-dw\ m^{-2}$ ), the total creek bed area and the percent of the creek bed covered by periphyton. Over the 18 km reach under consideration for this study, the average channel width is 12.6 m (inter-quartile range 9.93 – 13.7 m), assuming a triangular channel cross section with depth of 1 m the bed area =  $229,639\ m^2$ . Lacking any direct measurement, for the purposes of these calculations we adopted 60% as the percent of the bed covered by active periphyton. Additionally there is not a direct measure for the bioavailable Hg species concentrations. To estimate these values we used a percentage of the total ambient Hg and total ambient MMHg of the periphyton at the time of sampling. Since the percent availability of the Hg species may vary we used a range from 50% to 80%, along with the total periphyton mass, to estimate the MMHg flux attributed to periphyton activity.

The  $k_m$  and  $k_d$  from the February time series were used for these calculations. These rate potentials are from a full light assay from the downstream site. Since we measured differences in net methylation upstream versus downstream and light versus dark we wanted to try and account for these variables in our calculations. To do this we used three separate Eqn. S1's (downstream daytime; upstream daytime and nighttime) and summed them for the total periphyton MMHg flux. The upstream section is 7.2 km of the total 18 km and the downstream section is 10.8 km of the total 18 km; this division between upstream and downstream was based on watershed characteristics. The daytime was 10.5 h and the nighttime was 13.5 h. For the “downstream daytime” flux we took the MMHg flux (Eqn. S1) and multiplied it by 10.8 km/18 km to account for it being the downstream section and 10.5 h/24 h to

account for it being during the daytime. Next, since we don't have a direct measure of the net methylation upstream for the February assay we used the ratio of the November upstream net methylation ( $0.223 \text{ ng g-dw}^{-1} \text{ d}^{-1}$ ) divided by the November downstream net methylation ( $0.404 \text{ ng g-dw}^{-1} \text{ d}^{-1}$ ) as a correction factor. We then multiplied the MMHg flux (Eqn. S1) by this factor as well as the daytime correction factor ( $10.5 \text{ h}/24 \text{ h}$ ) and the upstream correction factor ( $7.2 \text{ km}/18 \text{ km}$ ) to get the final "upstream daytime" flux. Finally for the "nighttime" flux we used the ratio of the dark May assay net methylation ( $0.035 \text{ ng g-dw}^{-1} \text{ d}^{-1}$ ) divided by the light May assay net methylation ( $0.395 \text{ ng g-dw}^{-1} \text{ d}^{-1}$ ) as a correction factor. We then multiplied the MMHg flux (Eqn. S1) by this factor as well as the nighttime correction factor ( $13.5 \text{ h}/24 \text{ h}$ ) to get the final "nighttime" flux. The sum of the three parts (downstream daytime, upstream daytime and nighttime) gives the total flux. This calculation was done for a range of Hg species bioavailability (Figure S4). As a comparison the total MMHg flux in the water discharging from EFPC on the day we started the February assay was  $14.8 \text{ mg d}^{-1}$ .

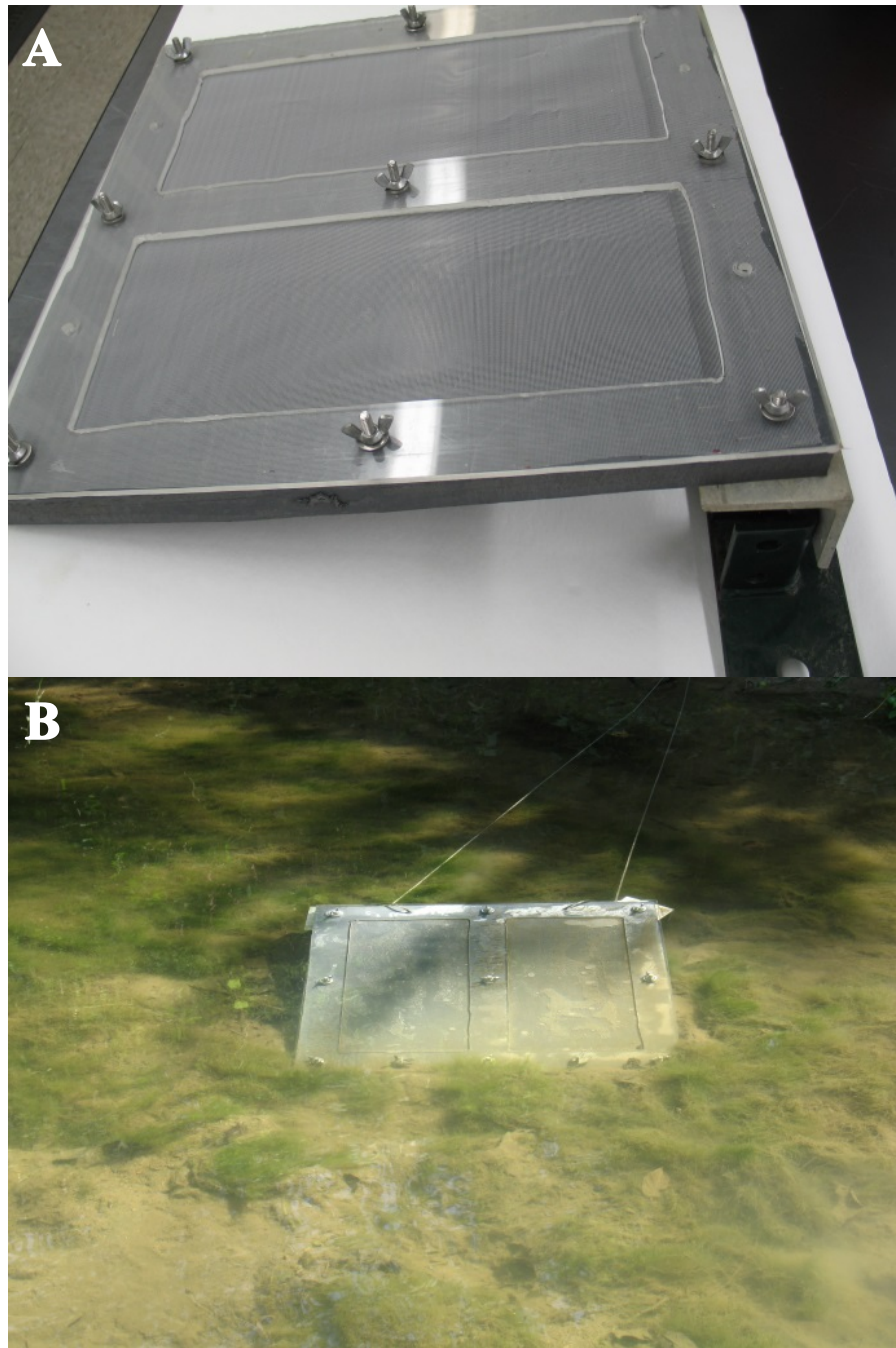

**Figure S1.** Periphyton growth structures before (A) and immediately after (B) stream deployment (9/19/2014) and illustrating the abundant periphyton growth on the creek bed. The structures consist of an 45.72 cm  $\times$  45.72 cm  $\times$  2.54 cm polypropylene base, an 45.72 cm  $\times$  45.72 cm  $\times$  0.635 cm frame with two 35.56 cm  $\times$  15.24 cm windows and an 45.72 cm  $\times$  45.72 cm polypropylene mesh sheet. The mesh sheet is sandwiched between the base and the frame so that two 35.56 cm  $\times$  15.24 cm sections of the mesh are exposed. The exposed sections are where the periphyton grew. The structure was secured in the creek with steel cables (B) and attached to rebar that was secured to the stream bank.

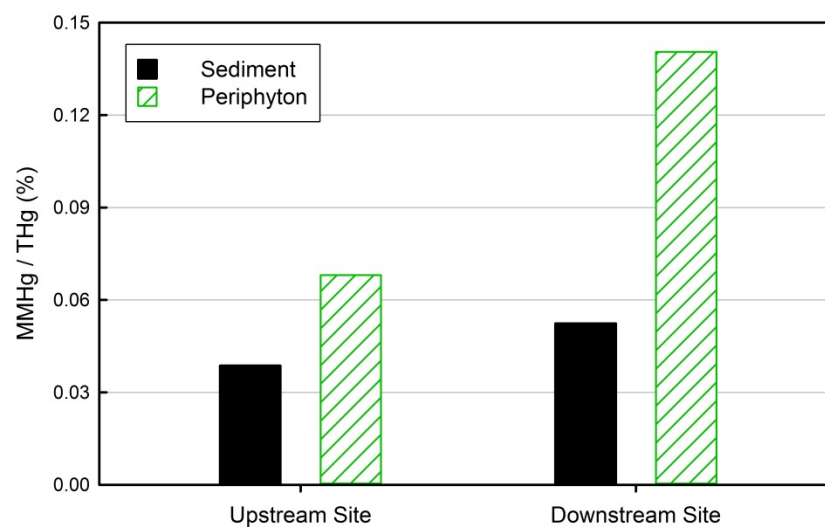

**Figure S2.** Longitudinal results from the upstream and downstream sites showing percent MMHg in sediment and periphyton. Each bar is the mean value of samples taken once a month from Sept. 2014 through Oct. 2015.

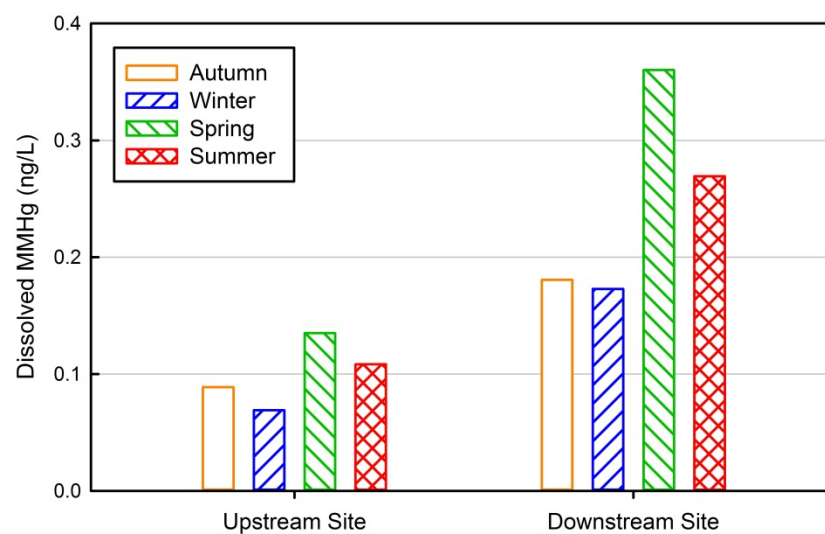

**Figure S3.** Dissolved MMHg concentrations in EFPC water column from the upstream and downstream sites. Each bar is the mean value of samples taken once a month from Sept. 2014 through Aug. 2015 separated by season.

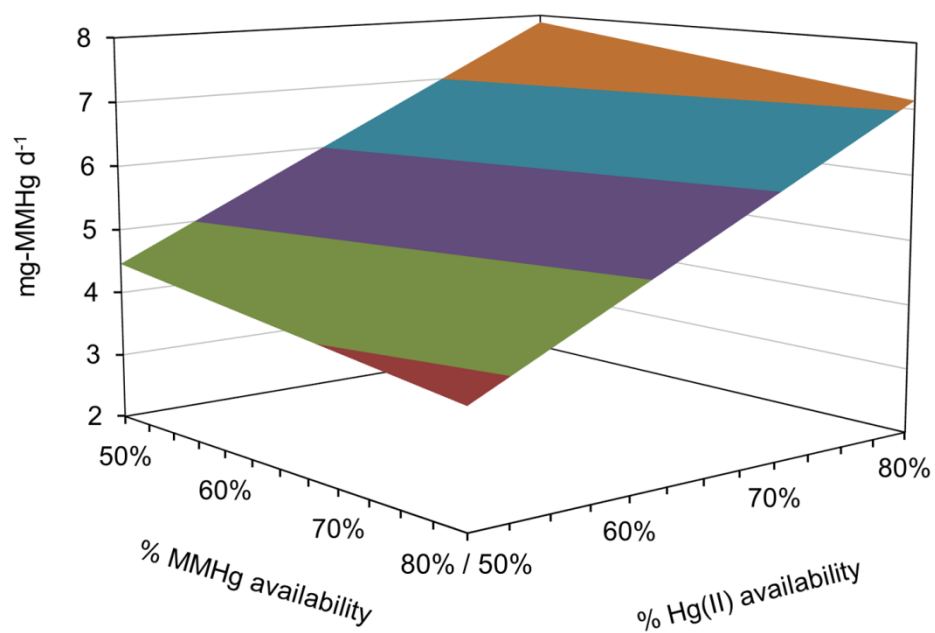

**Figure S4.** February 2015 time series showing the change in MMHg flux in EFPC that can be attributed to periphyton activity by varying the percent availability of the ambient MMHg and  $\text{Hg}^{\text{II}}$ . The space examined was held between 50% and 80% Hg species availability.



**Table S1:** Methylation and demethylation rate potentials intercomparison

| Study           | Location       | Water Body             | Temp    | Length | Light exposure       | Intact | Tracer type                                                         | % Ambient Tracer used | k <sub>m</sub>  | k <sub>d</sub>  | Notes                               |
|-----------------|----------------|------------------------|---------|--------|----------------------|--------|---------------------------------------------------------------------|-----------------------|-----------------|-----------------|-------------------------------------|
|                 |                |                        | °C      | h      |                      |        |                                                                     |                       | d <sup>-1</sup> | d <sup>-1</sup> |                                     |
| This work       | Tennessee      | East Fork Poplar Creek | 20      | 48     | Light                | Yes    | <sup>201</sup> HgCl <sub>2</sub> /MM <sup>202</sup> Hg              | 193%/65.8%            | 4.99E-05        | 0.085           | EFPC: Downstream                    |
| This work       | Tennessee      | East Fork Poplar Creek | 20      | 48     | Light                | Yes    | <sup>201</sup> HgCl <sub>2</sub> /MM <sup>202</sup> Hg              | 50.6%/131.1%          | 4.43E-05        | 0.171           | EFPC: Upstream                      |
| This work       | Tennessee      | East Fork Poplar Creek | 10      | 48     | Light                | Yes    | <sup>201</sup> HgCl <sub>2</sub> /MM <sup>202</sup> Hg              | 14.5%/22.5%           | 3.02E-05        | 0.068           | EFPC: Downstream                    |
| This work       | Tennessee      | East Fork Poplar Creek | 20      | 48     | Light                | Yes    | <sup>201</sup> HgCl <sub>2</sub> /MM <sup>202</sup> Hg              | 35.3%/42.7%           | 5.23E-05        | 0.072           | EFPC: Downstream                    |
| This work       | Tennessee      | East Fork Poplar Creek | 20      | 48     | Dark                 | Yes    | <sup>201</sup> HgCl <sub>2</sub> /MM <sup>202</sup> Hg              | 35.3%/42.7%           | 2.15E-05        | 0.071           | EFPC: Downstream                    |
| This work       | Tennessee      | East Fork Poplar Creek | 20      | 48     | Light                | Yes    | <sup>201</sup> HgCl <sub>2</sub> /MM <sup>202</sup> Hg              | 99.8%/45.6%           | 4.12E-05        | 0.221           | EFPC: Upstream                      |
| This work       | Tennessee      | East Fork Poplar Creek | 20      | 48     | Light                | No     | <sup>201</sup> HgCl <sub>2</sub> /MM <sup>202</sup> Hg              | 99.8%/45.6%           | 2.12E-05        | 0.208           | EFPC: Upstream                      |
| This work       | Tennessee      | East Fork Poplar Creek | 10      | 48     | Light                | Yes    | <sup>201</sup> HgCl <sub>2</sub> /MM <sup>202</sup> Hg              | 48.9%/182%            | 3.54E-05        | 0.099           | EFPC: Downstream                    |
| This work       | Tennessee      | East Fork Poplar Creek | 10      | 48     | Light                | Yes    | <sup>201</sup> HgCl <sub>2</sub> /MM <sup>202</sup> Hg              | 66.3%/355%            | 3.18E-05        | 0.152           | EFPC: Upstream                      |
| This work       | Tennessee      | East Fork Poplar Creek | 20      | 48     | Light                | Yes    | <sup>201</sup> HgCl <sub>2</sub> /MM <sup>202</sup> Hg              | 38.2%/143%            | 4.93E-05        | 0.261           | EFPC: Upstream                      |
| This work       | Tennessee      | East Fork Poplar Creek | 20      | 48     | Dark                 | Yes    | <sup>201</sup> HgCl <sub>2</sub> /MM <sup>202</sup> Hg              | 38.2%/143%            | 2.32E-05        | 0.236           | EFPC: Upstream                      |
| This work       | Tennessee      | East Fork Poplar Creek | 20      | 48     | Light                | No     | <sup>201</sup> HgCl <sub>2</sub> /MM <sup>202</sup> Hg              | 38.2%/143%            | 2.98E-05        | 0.197           | EFPC: Upstream                      |
| This work       | Tennessee      | East Fork Poplar Creek | 20      | 48     | Light                | Yes    | <sup>201</sup> HgCl <sub>2</sub> /MM <sup>202</sup> Hg              | 38.2%/143%            | 4.83E-05        | 0.273           | EFPC: Upstream (rocks)              |
| Desrosiers 2006 | Quebec, Canada | Lake Croche            | 25      | 12     | 12 h light/12 h dark | Yes    | <sup>203</sup> HgCl <sub>2</sub> / <sup>194</sup> HgNO <sub>3</sub> | 3.09%                 | 5.90E-04        |                 |                                     |
| Desrosiers 2006 | Quebec, Canada | Lake Croche            | 20      | 12     | 12 h light/12 h dark | Yes    | <sup>203</sup> HgCl <sub>2</sub> / <sup>194</sup> HgNO <sub>3</sub> | 2.11%                 | 4.40E-04        |                 |                                     |
| Desrosiers 2006 | Quebec, Canada | Lake Croche            | 15      | 48     | 12 h light/12 h dark | Yes    | <sup>203</sup> HgCl <sub>2</sub> / <sup>194</sup> HgNO <sub>3</sub> | 1.27%                 | 1.60E-05        |                 |                                     |
| Hamelin 2011    | Quebec, Canada | St. Lawrence River     | 21-23   | 48     | Incubated in field   | Yes    | <sup>199</sup> HgO/MM <sup>200</sup> Hg                             | 46.2%/2.1%            | 1.70E-03        | 0.187           |                                     |
| Acha 2011       | Bolivia        | Lake La Granja         | 30      | 12     | Dark                 | Yes    | <sup>200</sup> HgCl <sub>2</sub> /MM <sup>202</sup> Hg              | - ND -*               | 2.32E-04        | 0.178           | macrophyte: <i>E. crassipes</i>     |
| Acha 2011       | Bolivia        | Lake La Granja         | 30      | 12     | Dark                 | Yes    | <sup>200</sup> HgCl <sub>2</sub> /MM <sup>202</sup> Hg              | - ND -                | 3.45E-04        | 0.232           | macrophyte: <i>P. densiflorum</i>   |
| Cleckner 1999   | Florida        | Everglades             | Ambient | 3      | Ambient Light        | Yes    | <sup>203</sup> Hg                                                   | 50%-300%              | 2.26E-02        |                 | Site F1 12/95                       |
| Cleckner 1999   | Florida        | Everglades             | Ambient | 3      | Dark                 | Yes    | <sup>203</sup> Hg                                                   | 50%-300%              | 2.32E-01        |                 | Site F1 12/95                       |
| Cleckner 1999   | Florida        | Everglades             | Ambient | 3      | Ambient Light        | Yes    | <sup>203</sup> Hg                                                   | 50%-300%              | 2.01E-04        |                 | Site U3 12/95                       |
| Cleckner 1999   | Florida        | Everglades             | Ambient | 3      | Dark                 | Yes    | <sup>203</sup> Hg                                                   | 50%-300%              | 5.15E-04        |                 | Site U3 12/95                       |
| Cleckner 1999   | Florida        | Everglades             | Ambient | 3      | Ambient Light        | Yes    | <sup>203</sup> Hg                                                   | 50%-300%              | 1.93E-02        |                 | Site F1 03/96                       |
| Cleckner 1999   | Florida        | Everglades             | Ambient | 3      | Dark                 | Yes    | <sup>203</sup> Hg                                                   | 50%-300%              | 4.15E-02        |                 | Site F1 03/96                       |
| Cleckner 1999   | Florida        | Everglades             | Ambient | 3      | Ambient Light        | Yes    | <sup>203</sup> Hg                                                   | 50%-300%              | 1.98E-03        |                 | Site U3 03/96                       |
| Cleckner 1999   | Florida        | Everglades             | Ambient | 3      | Dark                 | Yes    | <sup>203</sup> Hg                                                   | 50%-300%              | 5.18E-03        |                 | Site U3 03/96                       |
| Correia 2012    | Bolivia        | Lake La Granja         | 22-28   | 48     | Dark                 | No     | <sup>203</sup> HgCl <sub>2</sub>                                    | - ND -                | 1.81E-01        |                 | macrophyte: <i>L. helminthoriza</i> |
| Correia 2012    | Bolivia        | Viejo River            | 22-28   | 48     | Dark                 | No     | <sup>203</sup> HgCl <sub>2</sub>                                    | - ND -                | 2.15E-02        |                 | macrophyte: <i>H. donacifolia</i>   |
| Correia 2012    | Bolivia        | Viejo River            | 22-28   | 48     | Dark                 | No     | <sup>203</sup> HgCl <sub>2</sub>                                    | - ND -                | 1.90E-02        |                 | macrophyte: <i>H. rotundifolia</i>  |
| Correia 2012    | Bolivia        | La Granja              | 22-28   | 48     | Dark                 | No     | <sup>203</sup> HgCl <sub>2</sub>                                    | - ND -                | 1.38E-01        |                 | macrophyte: <i>P. densiflorum</i>   |
| Correia 2012    | Bolivia        | Salinas                | 22-28   | 48     | Dark                 | No     | <sup>203</sup> HgCl <sub>2</sub>                                    | - ND -                | 1.00E-03        |                 | macrophyte: <i>P. densiflorum</i>   |
| Huguet 2010     | French Guiana  | Petit-Saut Reservoir   | 30      | 168    | Dark                 | No     | <sup>199</sup> HgCl <sub>2</sub>                                    | 2000%                 | 5.00E-05        |                 | Reservoir Depth: 6.5 m              |
| Huguet 2010     | French Guiana  | Petit-Saut Reservoir   | 30      | 168    | Dark                 | No     | <sup>199</sup> HgCl <sub>2</sub>                                    | 2200%                 | 7.00E-05        |                 | Reservoir Depth: 15 m               |
| Huguet 2010     | French Guiana  | Petit-Saut Reservoir   | 30      | 168    | Dark                 | No     | <sup>199</sup> HgCl <sub>2</sub>                                    | 1700%                 | 2.60E-04        |                 | Reservoir Depth: 20 m               |
| Huguet 2010     | French Guiana  | Sinnamary Estuary      | 30      | 168    | Dark                 | No     | <sup>199</sup> HgCl <sub>2</sub>                                    | 490%                  | 1.50E-03        |                 | Passerelle Station                  |
| Huguet 2010     | French Guiana  | Sinnamary Estuary      | 30      | 168    | Dark                 | No     | <sup>199</sup> HgCl <sub>2</sub>                                    | 21000%                | 4.00E-04        |                 | Venus Station                       |
| Mauro 2002      | Florida        | Everglades             | 30      | 24     | Dark                 | Yes    | <sup>203</sup> HgCl <sub>2</sub>                                    | - ND -                | 7.67E-02        |                 | macrophyte: <i>S. rotundifolia</i>  |
| Mauro 2002      | Florida        | Everglades             | 30      | 24     | Dark                 | Yes    | <sup>203</sup> HgCl <sub>2</sub>                                    | - ND -                | 1.03E-01        |                 | macrophyte: <i>P. stratiotes</i>    |
| Mauro 2002      | Florida        | Everglades             | 30      | 24     | Dark                 | Yes    | <sup>203</sup> HgCl <sub>2</sub>                                    | - ND -                | 1.62E-01        |                 | macrophyte: <i>E. crassipes</i>     |
| Mauro 2002      | Florida        | Everglades             | 30      | 24     | Dark                 | Yes    | <sup>203</sup> HgCl <sub>2</sub>                                    | - ND -                | 1.71E-01        |                 | macrophyte: <i>C. demersum</i>      |
| Mauro 2002      | Florida        | Everglades             | 30      | 24     | Dark                 | Yes    | <sup>200</sup> HgCl <sub>2</sub> /MM <sup>199</sup> Hg              | - ND -                | 1.91E-02        | 0.068           | macrophyte: <i>S. rotundifolia</i>  |
| Mauro 2002      | Florida        | Everglades             | 30      | 24     | Dark                 | Yes    | <sup>200</sup> HgCl <sub>2</sub> /MM <sup>199</sup> Hg              | - ND -                | 4.31E-02        | 0.092           | macrophyte: <i>P. stratiotes</i>    |
| Mauro 2002      | Florida        | Everglades             | 30      | 24     | Dark                 | Yes    | <sup>200</sup> HgCl <sub>2</sub> /MM <sup>199</sup> Hg              | - ND -                | 6.00E-02        | 0.187           | macrophyte: <i>E. crassipes</i>     |
| Mauro 2002      | Florida        | Everglades             | 30      | 24     | Dark                 | Yes    | <sup>200</sup> HgCl <sub>2</sub> /MM <sup>199</sup> Hg              | - ND -                | 7.32E-02        | 0.224           | macrophyte: <i>C. demersum</i>      |

\* ND : could not be determined with the information provided in the manuscript

**Table S2:** Ancillary water quality parameters measured at the upstream and downstream periphyton growth locations. Values represent the median (1<sup>st</sup> and 3<sup>rd</sup> quartiles) of 11 monthly samples collected between May 2014 and April 2015. The influence of the waste water treatment plant effluent is most evident in the elevated nitrate and soluble reactive phosphorous concentrations at the downstream location.

| Parameter                    | Units               | Upstream Site      | Downstream Site    |
|------------------------------|---------------------|--------------------|--------------------|
| Chloride                     | mg L <sup>-1</sup>  | 19.5 (18.6 - 25.1) | 18.7 (12.9 - 23.9) |
| Dissolved Oxygen             | mg L <sup>-1</sup>  | 10.1 (8.74 - 10.9) | 8.9 (7.3 - 11.1)   |
| Dissolved Organic Carbon     | mg L <sup>-1</sup>  | 1.58 (1.34 - 2.34) | 2.42 (1.66 - 2.80) |
| Ammonia                      | µg L <sup>-1</sup>  | 18.8 (8.07 - 28.8) | 20.8 (15.5 - 26.6) |
| Nitrate                      | mg L <sup>-1</sup>  | 9.96 (9.76 - 10.7) | 14.0 (11.9 - 16.9) |
| pH                           | SU                  | 7.97 (7.48 - 8.10) | 7.27 (7.02 - 7.66) |
| Specific Conductance         | µS cm <sup>-1</sup> | 398 (354 - 407)    | 366 (299 - 422)    |
| Soluble Reactive Phosphorous | µg L <sup>-1</sup>  | 46.6 (24.7 - 64.3) | 223 (47.0 - 398)   |
| Sulfate                      | mg L <sup>-1</sup>  | 33.5 (32.1 - 34.8) | 21.9 (15.8 - 22.6) |
| Total Suspended Solids       | mg L <sup>-1</sup>  | 2.9 (2.3- 3.6)     | 5.6 (2.6 - 7.5)    |

**Table S3:** Matrix depicting treatment factors for which methylation and demethylation rate potentials were measured. Dates indicate when the samples were collected and assays initiated. Cell number in parentheses corresponds to the cell number listed Tables S5, S7, and S8.

|           | Location    |                  | upstream       |               |        |                |        |           |
|-----------|-------------|------------------|----------------|---------------|--------|----------------|--------|-----------|
|           | Temperature |                  | 20°C           |               |        | 10°C           |        |           |
|           | Exposure    |                  | Light          |               | Dark   | Light          |        | Dark      |
|           | Structure   |                  | Intact         | Disturbed     | Intact | Disturbed      | Intact | Disturbed |
| Substrate | PP Mesh     | (10)<br>11/24/14 | (8)<br>9/15/15 |               |        |                |        |           |
|           |             | (11)<br>9/15/15  |                |               |        |                |        |           |
|           | Glass Frit  |                  |                |               |        | (6)<br>1/29/16 |        |           |
|           | PP Sheet    | (12)<br>6/9/16   | (9)<br>6/9/16  | (7)<br>6/9/16 |        |                |        |           |
|           | Rock        | (13)<br>6/9/16   |                |               |        |                |        |           |

|           | Location    |                 | downstream |                |        |                |        |           |
|-----------|-------------|-----------------|------------|----------------|--------|----------------|--------|-----------|
|           | Temperature |                 | 20°C       |                |        | 10°C           |        |           |
|           | Exposure    |                 | Light      |                | Dark   | Light          |        | Dark      |
|           | Structure   |                 | Intact     | Disturbed      | Intact | Disturbed      | Intact | Disturbed |
| Substrate | PP Mesh     | (4)<br>11/24/14 |            | (3)<br>5/12/15 |        | (1)<br>2/3/15  |        |           |
|           |             | (5)<br>5/12/15  |            |                |        |                |        |           |
|           | Glass Frit  |                 |            |                |        | (2)<br>1/29/16 |        |           |
|           | PP Sheet    |                 |            |                |        |                |        |           |
|           | Rock        |                 |            |                |        |                |        |           |

PP = polypropylene

**Table S4:** Creek water temperatures for the 30-day period preceding assays.

| Assay Date     | Median Temperature (°C) (1 <sup>st</sup> and 3 <sup>rd</sup> quartiles) |
|----------------|-------------------------------------------------------------------------|
| November 2014  | 10.9 (8.8 – 12.5)                                                       |
| February 2015  | 7.9 (6.9 – 8.6)                                                         |
| May 2015       | 15.3 (14.6 – 16.1)                                                      |
| September 2015 | 23.1 (22.4 – 23.8)                                                      |
| January 2016   | 8.4 (6.5 – 9.7)                                                         |
| June 2016      | 19.6 (18.1 – 21.5)                                                      |

**Table S5:** Treatment overview and results for net methylation assays. Cell number corresponds to cell number given in Tables S3, S7 and S8. For Location, US = upstream, DS = downstream.

| Cell | Date       | Substrate | Location | Temp (°C) | Exposure | Structure | Ambient MMHg (ng g-dw <sup>-1</sup> ) | Ambient THg (ng g-dw <sup>-1</sup> ) | k <sub>m</sub> (d <sup>-1</sup> ) | k <sub>d</sub> (d <sup>-1</sup> ) | Net (ng g-dw <sup>-1</sup> d <sup>-1</sup> ) |
|------|------------|-----------|----------|-----------|----------|-----------|---------------------------------------|--------------------------------------|-----------------------------------|-----------------------------------|----------------------------------------------|
| 4    | 11/24/2014 | mesh      | DS       | 20        | Light    | Intact    | 3.36                                  | 13800                                | 4.48E-05                          | 8.64E-02                          | 3.28E-01                                     |
|      |            |           |          |           |          |           |                                       |                                      | 4.57E-05                          | 8.20E-02                          | 3.55E-01                                     |
|      |            |           |          |           |          |           |                                       |                                      | 5.92E-05                          | 8.62E-02                          | 5.27E-01                                     |
| 10   | 11/24/2014 | mesh      | US       | 20        | Light    | Intact    | 2.62                                  | 15100                                | 3.58E-05                          | 1.50E-01                          | 1.46E-01                                     |
|      |            |           |          |           |          |           |                                       |                                      | 4.76E-05                          | 1.64E-01                          | 2.89E-01                                     |
|      |            |           |          |           |          |           |                                       |                                      | 4.96E-05                          | 1.97E-01                          | 2.33E-01                                     |
| 1    | 2/3/2015   | mesh      | DS       | 10        | Light    | Intact    | 2.5                                   | 14200                                | 2.98E-05                          | 5.55E-02                          | 2.85E-01                                     |
|      |            |           |          |           |          |           |                                       |                                      | 3.75E-05                          | 7.11E-02                          | 3.54E-01                                     |
|      |            |           |          |           |          |           |                                       |                                      | 2.32E-05                          | 7.70E-02                          | 1.37E-01                                     |
| 5    | 5/12/2015  | mesh      | DS       | 20        | Light    | Intact    | 3.09                                  | 11800                                | 9.56E-05                          | 8.99E-02                          | 8.51E-01                                     |
|      |            |           |          |           |          |           |                                       |                                      | 3.25E-05                          | 6.26E-02                          | 1.90E-01                                     |
|      |            |           |          |           |          |           |                                       |                                      | 2.89E-05                          | 6.40E-02                          | 1.43E-01                                     |
| 3    | 5/12/2015  | mesh      | DS       | 20        | Dark     | Intact    | 3.09                                  | 11800                                | 2.33E-05                          | 6.98E-02                          | 5.90E-02                                     |
|      |            |           |          |           |          |           |                                       |                                      | 2.03E-05                          | 6.84E-02                          | 2.84E-02                                     |
|      |            |           |          |           |          |           |                                       |                                      | 2.08E-05                          | 7.34E-02                          | 1.86E-02                                     |
| 11   | 9/15/2015  | mesh      | US       | 20        | Light    | Intact    | 1.85                                  | 13700                                | 4.31E-05                          | 2.17E-01                          | 1.90E-01                                     |
|      |            |           |          |           |          |           |                                       |                                      | 4.38E-05                          | 2.44E-01                          | 1.49E-01                                     |
|      |            |           |          |           |          |           |                                       |                                      | 3.67E-05                          | 2.03E-01                          | 1.28E-01                                     |
| 8    | 9/15/2015  | mesh      | US       | 20        | Light    | Disturbed | 1.85                                  | 13700                                | 2.26E-05                          | 2.29E-01                          | -1.13E-01                                    |
|      |            |           |          |           |          |           |                                       |                                      | 2.06E-05                          | 1.89E-01                          | -6.79E-02                                    |
|      |            |           |          |           |          |           |                                       |                                      | 2.03E-05                          | 2.06E-01                          | -1.03E-01                                    |
| 2    | 1/29/2016  | frit      | DS       | 10        | Light    | Intact    | 2.04                                  | 13289                                | 3.58E-05                          | 1.02E-01                          | 2.68E-01                                     |
|      |            |           |          |           |          |           |                                       |                                      | 3.93E-05                          | 9.17E-02                          | 3.35E-01                                     |
|      |            |           |          |           |          |           |                                       |                                      | 3.10E-05                          | 1.05E-01                          | 1.98E-01                                     |
| 6    | 1/29/2016  | frit      | US       | 10        | Light    | Intact    | 1.40                                  | 13056                                | 4.11E-05                          | 1.46E-01                          | 3.32E-01                                     |
|      |            |           |          |           |          |           |                                       |                                      | 2.89E-05                          | 1.52E-01                          | 1.65E-01                                     |
|      |            |           |          |           |          |           |                                       |                                      | 2.56E-05                          | 1.61E-01                          | 1.09E-01                                     |
| 12   | 6/9/2016   | sheet     | US       | 20        | Light    | Intact    | 3.12                                  | 22192                                | 4.80E-05                          | 2.68E-01                          | 2.28E-01                                     |
|      |            |           |          |           |          |           |                                       |                                      | 5.24E-05                          | 2.43E-01                          | 4.02E-01                                     |
|      |            |           |          |           |          |           |                                       |                                      | 4.76E-05                          | 2.73E-01                          | 2.04E-01                                     |
| 7    | 6/9/2016   | sheet     | US       | 20        | Dark     | Intact    | 3.12                                  | 22192                                | 2.95E-05                          | 2.84E-01                          | -2.33E-01                                    |
|      |            |           |          |           |          |           |                                       |                                      | 2.08E-05                          | 2.21E-01                          | -2.31E-01                                    |
|      |            |           |          |           |          |           |                                       |                                      | 1.92E-05                          | 2.03E-01                          | -2.09E-01                                    |
| 9    | 6/9/2016   | sheet     | US       | 20        | Light    | Disturbed | 3.12                                  | 22192                                | 2.64E-05                          | 1.97E-01                          | -2.97E-02                                    |
|      |            |           |          |           |          |           |                                       |                                      | 3.27E-05                          | 1.71E-01                          | 1.90E-01                                     |
|      |            |           |          |           |          |           |                                       |                                      | 3.05E-05                          | 2.25E-01                          | -2.60E-02                                    |
| 13   | 6/9/2016   | rock      | US       | 20        | Light    | Intact    | 3.12                                  | 22192                                | 4.33E-05                          | 2.51E-01                          | 1.79E-01                                     |
|      |            |           |          |           |          |           |                                       |                                      | 5.43E-05                          | 2.94E-01                          | 2.87E-01                                     |
|      |            |           |          |           |          |           |                                       |                                      | 4.72E-05                          | 2.76E-01                          | 1.84E-01                                     |

**Table S6:** Analysis of variance results from cell means model for  $k_m$  and  $k_d$ .

| Source          | DF | Sum of Squares        | Mean Square            | F Value | Prob > F | R <sup>2</sup> |
|-----------------|----|-----------------------|------------------------|---------|----------|----------------|
| $k_m$           |    |                       |                        |         |          |                |
| Model           | 12 | $4.68 \times 10^{-9}$ | $3.90 \times 10^{-10}$ | 2.88    | 0.012    | 0.571          |
| Error           | 26 | $3.53 \times 10^{-9}$ | $1.36 \times 10^{-10}$ |         |          |                |
| Corrected Total | 38 | $8.21 \times 10^{-9}$ |                        |         |          |                |
| $k_d$           |    |                       |                        |         |          |                |
| Model           | 12 | 0.210                 | 0.0175                 | 44.47   | <0.001   | 0.953          |
| Error           | 26 | 0.010                 | 0.0004                 |         |          |                |
| Corrected Total | 38 | 0.220                 |                        |         |          |                |

**Table S7:** Probabilities of pairwise cell differences. Differences with probabilities  $\leq 0.05$  are indicated in boldface. Loc. = location, DS = downstream, US = upstream. Tmp. = temperature. Exp. = light exposure treatment, LT = incubated in light, DK = incubated in dark. Str. = structure, IN = intact, DS = disturbed. Sub. = substrate, M = polypropylene mesh, F = glass frit, S = polypropylene sheet, R = rock from stream. Cell number corresponds to cell number indicated in Tables S3, S5, and S8.

[illegible]

**Table S8:** Results of the cell means analysis for methylation rate potential ( $k_m$ ) and demethylation rate potential ( $k_d$ ). The group identifier denotes those cells whose means are statistically indistinguishable at  $p \leq 0.05$ .

| Cell  | Mean      | Group | Location <sup>a</sup> | Temperature | Exposure | Structure | Substrate <sup>b</sup> |
|-------|-----------|-------|-----------------------|-------------|----------|-----------|------------------------|
| $k_m$ |           |       |                       |             |          |           |                        |
| 8     | 0.0000212 | A     | US                    | 20          | Light    | Disturbed | mesh                   |
| 3     | 0.0000215 | A     | DS                    | 20          | Dark     | Intact    | mesh                   |
| 7     | 0.0000232 | AB    | US                    | 20          | Dark     | Intact    | sheet                  |
| 9     | 0.0000298 | ABC   | US                    | 20          | Light    | Disturbed | sheet                  |
| 1     | 0.0000302 | ABC   | DS                    | 10          | Light    | Intact    | mesh                   |
| 6     | 0.0000318 | ABC   | US                    | 10          | Light    | Intact    | frit                   |
| 2     | 0.0000354 | ABCD  | DS                    | 10          | Light    | Intact    | frit                   |
| 11    | 0.0000412 | BCD   | US                    | 20          | Light    | Intact    | mesh                   |
| 10    | 0.0000443 | CD    | US                    | 20          | Light    | Intact    | mesh                   |
| 13    | 0.0000483 | CD    | US                    | 20          | Light    | Intact    | rock                   |
| 12    | 0.0000493 | CD    | US                    | 20          | Light    | Intact    | sheet                  |
| 4     | 0.0000499 | D     | DS                    | 20          | Light    | Intact    | mesh                   |
| 5     | 0.0000524 | D     | DS                    | 20          | Light    | Intact    | mesh                   |
| $k_d$ |           |       |                       |             |          |           |                        |
| 1     | 0.0679    | A     | DS                    | 10          | Light    | Intact    | mesh                   |
| 3     | 0.0705    | A     | DS                    | 20          | Dark     | Intact    | mesh                   |
| 5     | 0.0722    | A     | DS                    | 20          | Light    | Intact    | mesh                   |
| 4     | 0.0848    | A     | DS                    | 20          | Light    | Intact    | mesh                   |
| 2     | 0.0995    | A     | DS                    | 10          | Light    | Intact    | frit                   |
| 6     | 0.153     | B     | US                    | 10          | Light    | Intact    | frit                   |
| 10    | 0.171     | BC    | US                    | 20          | Light    | Intact    | mesh                   |
| 9     | 0.198     | CD    | US                    | 20          | Light    | Disturbed | sheet                  |
| 8     | 0.208     | D     | US                    | 20          | Light    | Disturbed | mesh                   |
| 11    | 0.221     | DE    | US                    | 20          | Light    | Intact    | mesh                   |
| 7     | 0.236     | EF    | US                    | 20          | Dark     | Intact    | sheet                  |
| 12    | 0.261     | FG    | US                    | 20          | Light    | Intact    | sheet                  |
| 13    | 0.274     | G     | US                    | 20          | Light    | Intact    | rock                   |

<sup>a</sup> US = upstream; DS = downstream

<sup>b</sup> mesh = polypropylene mesh; frit = glass frit; sheet = perforated polypropylene sheet; rock = rocks from the stream
